# Supplementary material for: Physico-chemical and biological properties of C60-l-hydroxyproline water solutions
Source: Royal Society of Chemistry journal article supplement (doi:10.1039/c6ra26621e), 2017-01-01
Supplement: c6ra26621e1.pdf [file c6ra26621e1.pdf]

## Supporting Information

### Physico-chemical and biological properties of the C<sub>60</sub>-L-hydroxyproline water solutions

Konstantin N. Semenov<sup>1,\*</sup>, Anatolii A. Meshcheriakov<sup>1</sup>, Nikolay A. Charykov<sup>2</sup>, Viktor A. Keskinov<sup>2</sup>, Igor V. Murin<sup>1</sup>, Gayane G. Panova<sup>3</sup>, Vladimir V. Sharoyko<sup>1</sup>, Elena V. Kanash<sup>3</sup>,  
Yuriy V. Khomyakov<sup>3</sup>

<sup>1</sup>Saint-Petersburg State University, St. Petersburg, Russia, 198504, Universitetskii pr. 26; <sup>2</sup>Saint-Petersburg State Technological Institute (Technical University), St. Petersburg, Russia, 190013, Moskovskii pr., 26., <sup>3</sup>Agrophysical Research Institute, St. Petersburg, Russia, 195220, Grazhdansky pr. 14

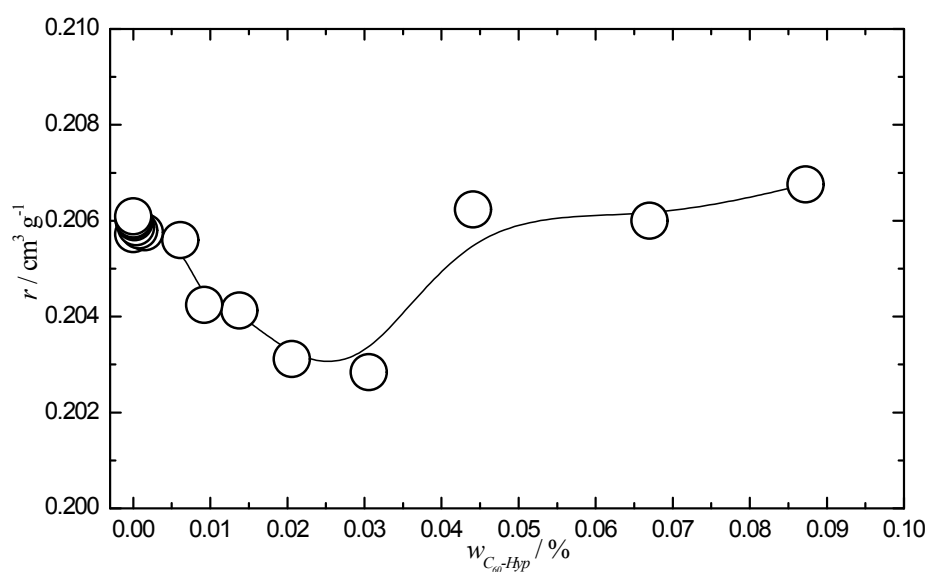

Figure 1. Mass fraction ( $w_{C_{60}\text{-Hyp}}$ ) dependence of the C<sub>60</sub>-Hyp water solution specific refraction ( $r$ ) at 298.15 K.

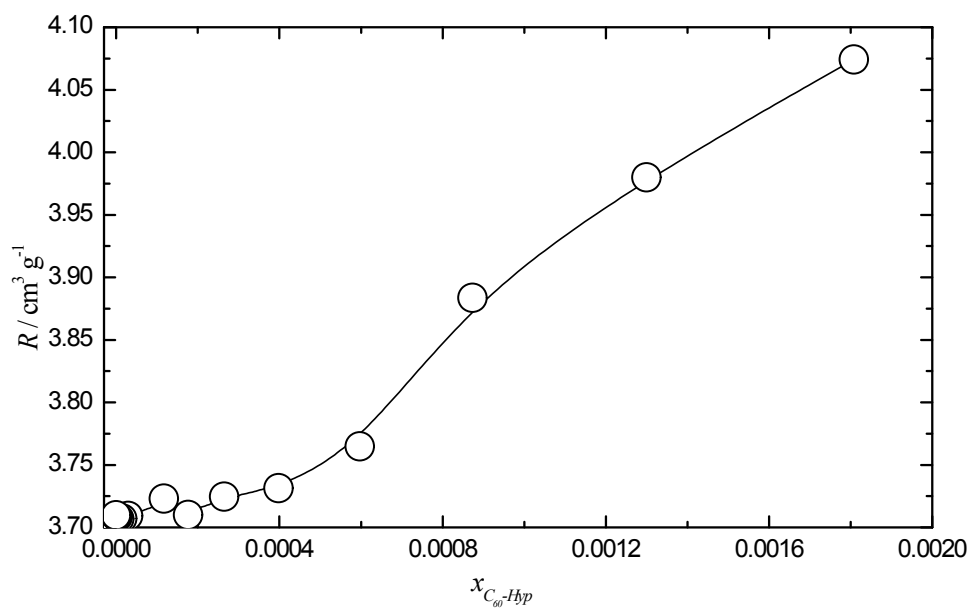

Figure 2. Mole fraction ( $x_{C_{60}\text{-Hyp}}$ ) dependence of the  $C_{60}$ -Hyp water solution molar refraction ( $R$ ) at 298.15 K

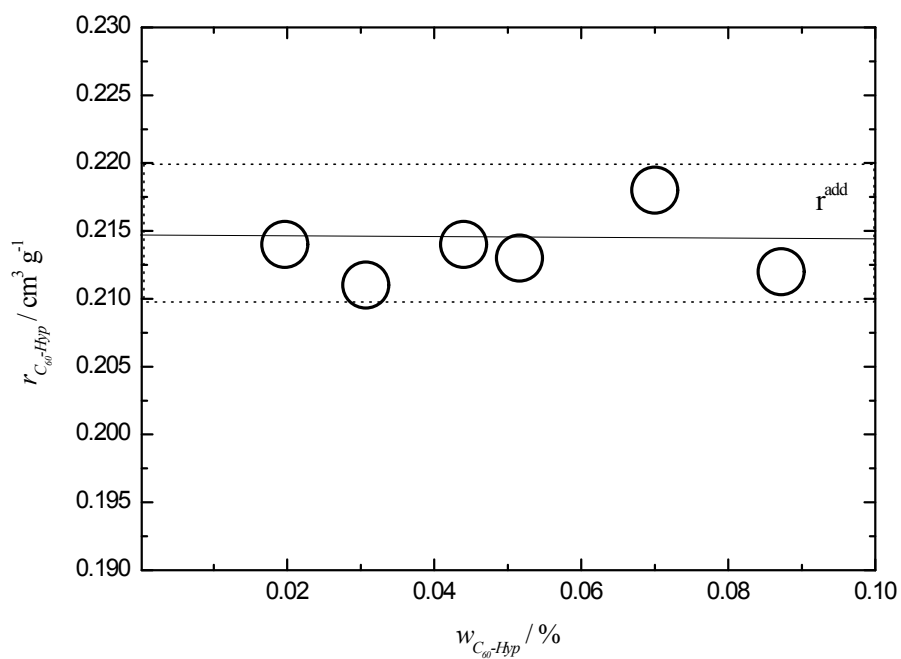

Figure 3. Specific refraction of  $C_{60}$ -Hyp ( $r_{C_{60}\text{-Hyp}}$ ) in water solutions at 298.15 K.

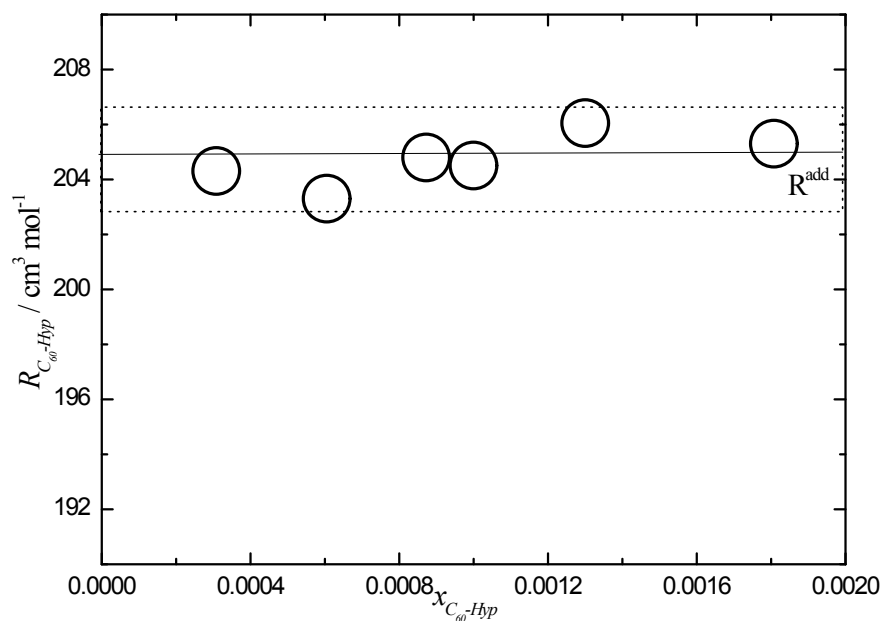

Figure 4. Molar refraction ( $R_{C_{60}\text{-Hyp}}$ ) of the  $C_{60}$ -Hyp derivative in water solutions at 298.15 K.

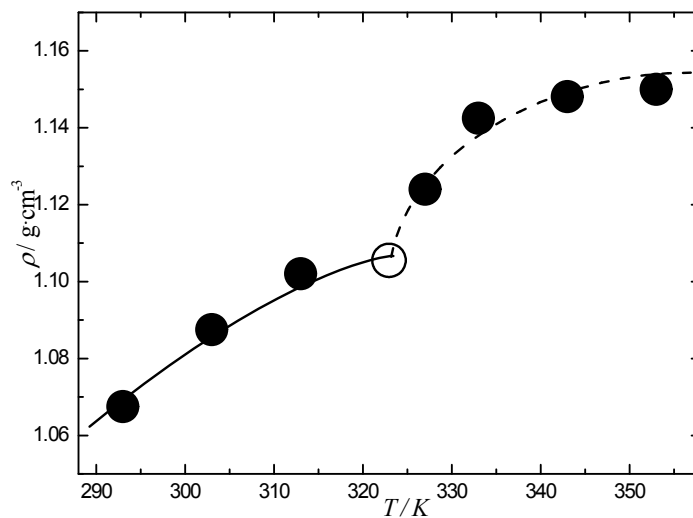

Figure 5. Temperature dependence of density ( $\rho$ ) of the  $C_{60}$ -Hyp water solutions. Solid line corresponds to crystallization of  $C_{60}(C_5H_9NO_3)_2 \cdot 2H_2O$ , dashed line corresponds to crystallization of non-hydrated fullerene derivative -  $C_{60}(C_5H_9NO_3)_2$ . O is a nonvariant point corresponding to simultaneous saturation by both solid phases  $C_{60}(C_5H_9NO_3)_2 \cdot 2H_2O$  and  $C_{60}(C_5H_9NO_3)_2$ .
